# Supplementary material for: Expansin genes expression in growing ovaries and grains of sunflower are tissue-specific and associate with final grain weight
Source: PubMed Central journal article supplement (PMC6280438; doi:10.1186/s12870-018-1535-7), 2018-12-04
Supplement: 12870_2018_1535_MOESM1_ESM.pdf [file 12870_2018_1535_MOESM1_ESM.pdf]

### Percent Identity

| Divergence |           | <b>1</b> | <b>2</b> | <b>3</b> | <b>4</b> | <b>5</b> | <b>6</b> | <b>7</b> | <b>8</b> | <b>9</b> | <b>10</b> | <b>11</b> | <b>12</b> | <b>13</b> | <b>14</b> | <b>15</b> | <b>16</b> |           |                                        |
|------------|-----------|----------|----------|----------|----------|----------|----------|----------|----------|----------|-----------|-----------|-----------|-----------|-----------|-----------|-----------|-----------|----------------------------------------|
|            | <b>1</b>  | ████     | 90.7     | 90.7     | 92.5     | 85.7     | 81.7     | 83.5     | 72.9     | 82.1     | 62.9      | 71.9      | 82.1      | 71.8      | 74.7      | 14.9      | 27.3      | <b>1</b>  | TRIAE_CS42_5DL_TGACv1_435145_AA1446640 |
|            | <b>2</b>  | 9.9      | ████     | 92.5     | 88.1     | 85.3     | 83.0     | 83.0     | 72.9     | 83.5     | 63.8      | 71.9      | 82.1      | 71.3      | 73.3      | 14.9      | 27.3      | <b>2</b>  | EXPA6 Brachypodium                     |
|            | <b>3</b>  | 9.9      | 7.9      | ████     | 89.8     | 87.5     | 87.5     | 87.1     | 74.7     | 87.5     | 64.7      | 73.3      | 87.1      | 72.2      | 74.2      | 14.9      | 27.3      | <b>3</b>  | LOC_Os03g60720.1 EXPA RICE             |
|            | <b>4</b>  | 7.9      | 13.0     | 11.0     | ████     | 84.4     | 81.7     | 82.6     | 71.9     | 83.0     | 62.9      | 70.6      | 83.5      | 70.4      | 72.9      | 15.8      | 26.9      | <b>4</b>  | Alpha-expansin4_Zea.mays               |
|            | <b>5</b>  | 15.9     | 16.4     | 13.7     | 17.6     | ████     | 90.2     | 88.8     | 76.5     | 91.1     | 66.2      | 75.6      | 89.3      | 73.6      | 76.5      | 16.8      | 27.8      | <b>5</b>  | EXPA soybean                           |
|            | <b>6</b>  | 21.0     | 19.3     | 13.7     | 21.0     | 10.6     | ████     | 86.6     | 75.1     | 95.5     | 66.2      | 73.8      | 95.5      | 73.1      | 75.6      | 16.8      | 27.3      | <b>6</b>  | Expa7 sunflower                        |
|            | <b>7</b>  | 18.7     | 19.3     | 14.3     | 19.9     | 12.1     | 14.8     | ████     | 75.6     | 85.7     | 65.8      | 74.7      | 86.2      | 73.1      | 76.0      | 14.9      | 26.9      | <b>7</b>  | EXPA4 Arabidopsis                      |
|            | <b>8</b>  | 33.7     | 33.7     | 31.0     | 35.1     | 28.3     | 30.3     | 29.6     | ████     | 75.1     | 68.6      | 83.7      | 75.1      | 80.6      | 95.9      | 17.4      | 26.8      | <b>8</b>  | Putative EXP1 HaT13I014971             |
|            | <b>9</b>  | 20.5     | 18.7     | 13.7     | 19.3     | 9.5      | 4.6      | 15.9     | 30.3     | ████     | 66.2      | 73.8      | 94.6      | 72.7      | 75.6      | 16.3      | 27.3      | <b>9</b>  | Putative EXP3 HaT13I005436             |
|            | <b>10</b> | 50.7     | 49.1     | 47.4     | 50.7     | 44.7     | 44.7     | 45.5     | 40.5     | 44.7     | ████      | 67.7      | 65.8      | 65.6      | 65.9      | 16.4      | 29.4      | <b>10</b> | Putative EXP11 HaT13I018566            |
|            | <b>11</b> | 35.1     | 35.1     | 33.0     | 37.3     | 29.6     | 32.3     | 31.0     | 18.4     | 32.3     | 42.1      | ████      | 73.3      | 88.0      | 82.4      | 18.9      | 29.1      | <b>11</b> | Putative EXPA1 HaT13I009552            |
|            | <b>12</b> | 20.5     | 20.5     | 14.3     | 18.7     | 11.6     | 4.6      | 15.3     | 30.3     | 5.6      | 45.5      | 33.0      | ████      | 72.2      | 75.6      | 15.8      | 27.3      | <b>12</b> | Putative EXPA4 HaT13I004607            |
|            | <b>13</b> | 35.4     | 36.2     | 34.7     | 37.7     | 32.5     | 33.3     | 33.3     | 22.6     | 34.0     | 45.9      | 13.2      | 34.7      | ████      | 78.7      | 17.5      | 28.8      | <b>13</b> | Putative EXPA10 Ha412T4I900C0S1        |
|            | <b>14</b> | 31.0     | 33.0     | 31.6     | 33.7     | 28.3     | 29.6     | 28.9     | 4.2      | 29.6     | 45.3      | 20.2      | 29.6      | 25.1      | ████      | 16.9      | 27.2      | <b>14</b> | Putative EXPA15 HaT13I025136           |
|            | <b>15</b> | 332.0    | 332.0    | 332.0    | 311.0    | 292.0    | 292.0    | 332.0    | 282.0    | 301.0    | 299.0     | 260.0     | 311.0     | 282.0     | 291.0     | ████      | 12.8      | <b>15</b> | EXLX1 Bacillus subtilis                |
|            | <b>16</b> | 178.7    | 178.7    | 178.7    | 182.3    | 175.2    | 178.7    | 182.3    | 183.1    | 178.7    | 163.6     | 165.8     | 178.7     | 167.6     | 179.3     | 386.0     | ████      | <b>16</b> | EXPB1 Maize                            |
|            |           | <b>1</b> | <b>2</b> | <b>3</b> | <b>4</b> | <b>5</b> | <b>6</b> | <b>7</b> | <b>8</b> | <b>9</b> | <b>10</b> | <b>11</b> | <b>12</b> | <b>13</b> | <b>14</b> | <b>15</b> | <b>16</b> |           |                                        |

**Figure S1**
