# Supplementary material for: Expansin genes expression in growing ovaries and grains of sunflower are tissue-specific and associate with final grain weight
Source: PubMed Central journal article supplement (PMC6280438; doi:10.1186/s12870-018-1535-7), 2018-12-04
Supplement: 12870_2018_1535_MOESM2_ESM.pdf [file 12870_2018_1535_MOESM2_ESM.pdf]

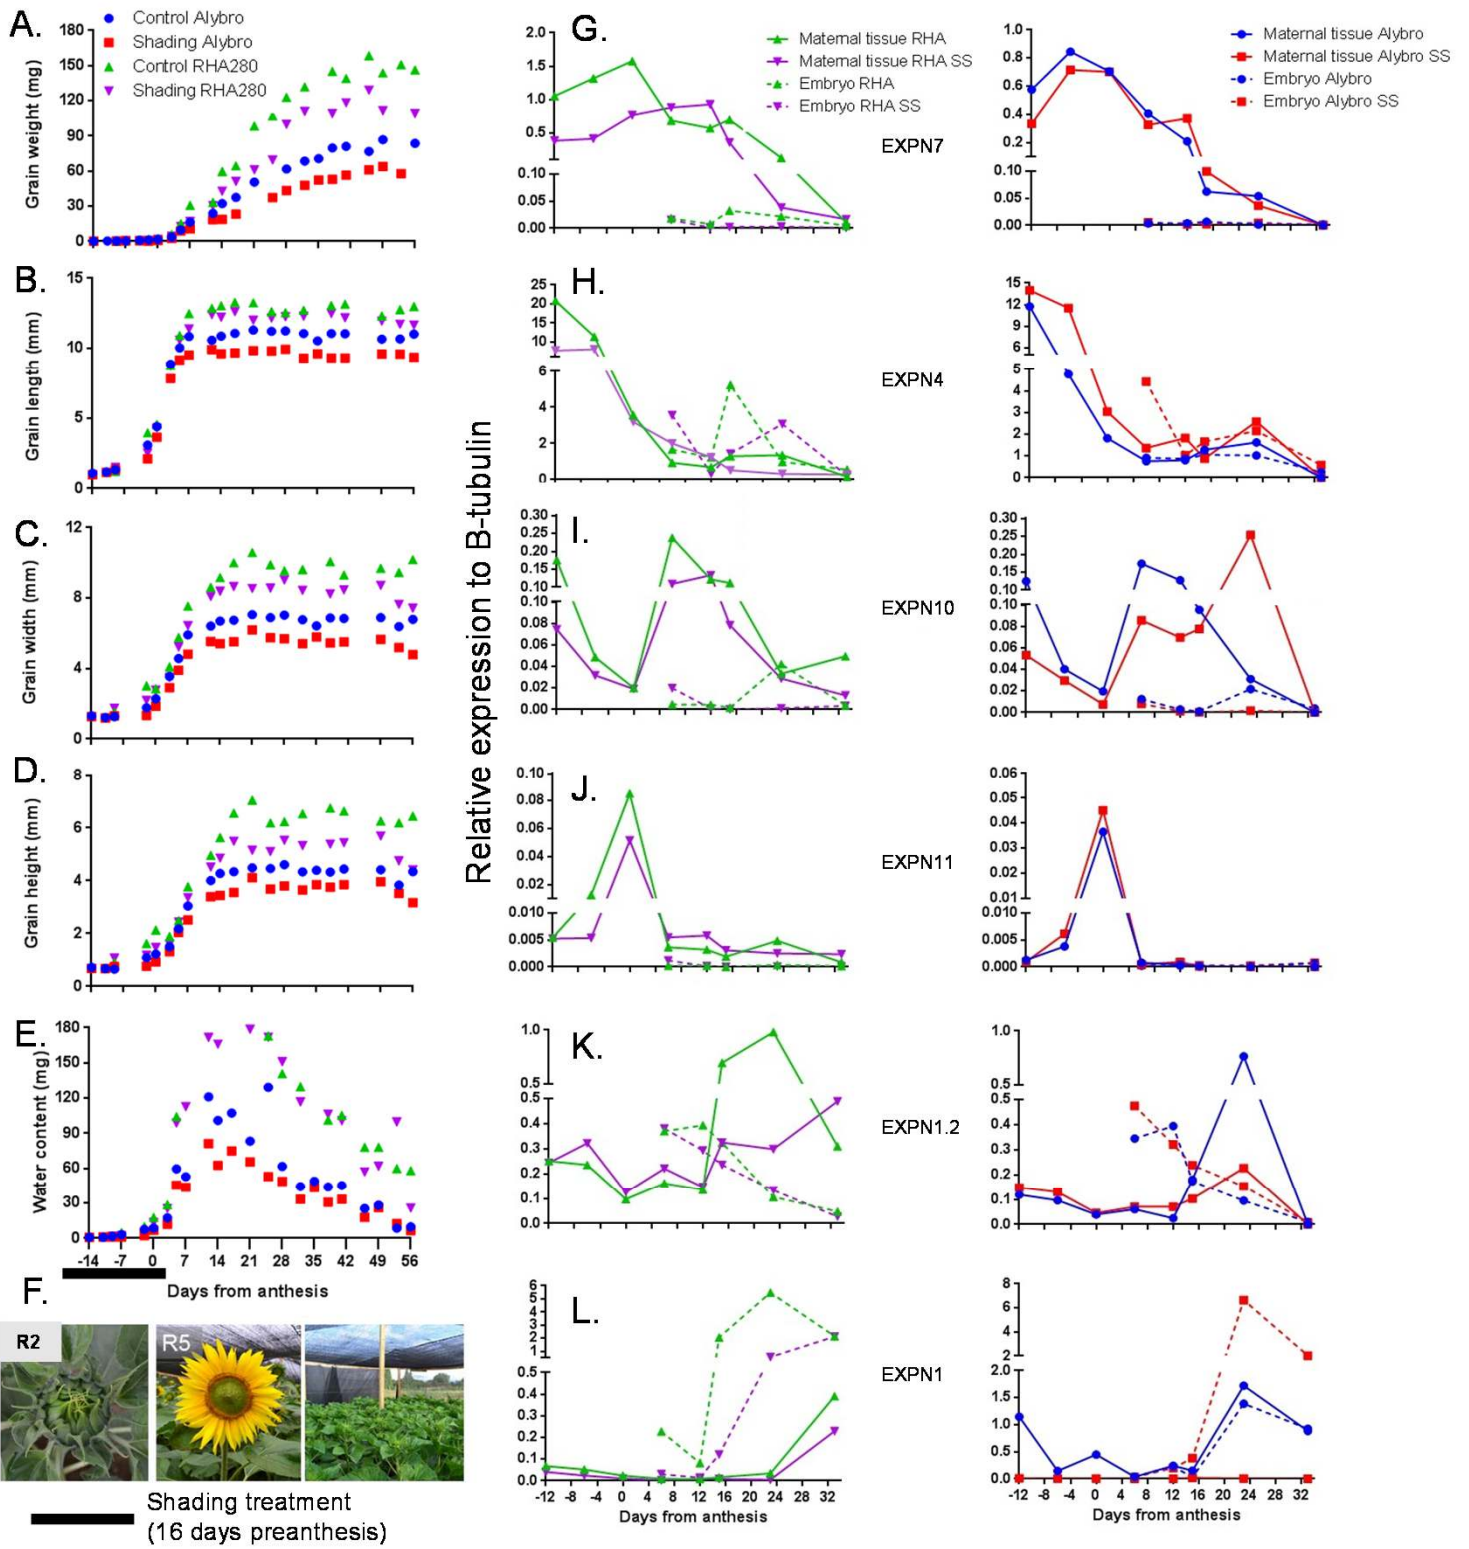

**Figure S2**
