# Supplementary material for: Expansin genes expression in growing ovaries and grains of sunflower are tissue-specific and associate with final grain weight
Source: PubMed Central journal article supplement (PMC6280438; doi:10.1186/s12870-018-1535-7), 2018-12-04
Supplement: 12870_2018_1535_MOESM4_ESM.pdf [file 12870_2018_1535_MOESM4_ESM.pdf]

Table S1.

| Characteristics                               | PUTATIVE EXPANSINS                                                           |                                                                              |                                                                              |                                                                              |                                                                              |                                                                              |                                                                              |                                                                              |
|-----------------------------------------------|------------------------------------------------------------------------------|------------------------------------------------------------------------------|------------------------------------------------------------------------------|------------------------------------------------------------------------------|------------------------------------------------------------------------------|------------------------------------------------------------------------------|------------------------------------------------------------------------------|------------------------------------------------------------------------------|
|                                               | Expansin A4<br>(HaEXPN4)                                                     | Expansin A7<br>(HaEXPN7)                                                     | Expansin 10<br>(HaEXPN10)                                                    | Expansin 11<br>(HaEXPN11)                                                    | Expansin 1<br>(HaEXPN1)                                                      | Expansin A1<br>(HaEXPN1.2)                                                   | Expansin 3<br>(HaEXPN3)                                                      | Expansin A15<br>(HaEXPN15)                                                   |
| <b>Accession<br/>HaT13I</b>                   | HaT131004607_1_AA                                                            | HaT131007346_1_AA                                                            | HaT131009575_1_AA                                                            | HaT131018566_1_AA                                                            | HaT131014971_1_AA                                                            | HaT131009552_1_AA                                                            | HaT131005436_1_AA                                                            | HaT131025136_1_AA                                                            |
| <b>Locus Tag<br/>(gene)<br/>accession XRQ</b> | HanXRQChr01g0009521                                                          | HanXRQChr06g0178721                                                          | HanXRQChr08g0210821                                                          | HanXRQChr13g0386941                                                          | HanXRQChr16g0503121                                                          | HanXRQChr17g0570851                                                          | HanXRQChr08g0236981                                                          | HanXRQChr09g0270611                                                          |
| <b>Chromosome</b>                             | HanXRQChr01                                                                  | HanXRQChr06                                                                  | HanXRQChr08                                                                  | HanXRQChr13                                                                  | HanXRQChr16                                                                  | HanXRQChr17                                                                  | HanXRQChr08                                                                  | HanXRQChr09                                                                  |
| <b>Start</b>                                  | 64064838                                                                     | 51216670                                                                     | 9589958                                                                      | 2469795                                                                      | 21219190                                                                     | 214553944                                                                    | 151037735                                                                    | 189762140                                                                    |
| <b>End</b>                                    | 64068076                                                                     | 51219551                                                                     | 9592439                                                                      | 2471756                                                                      | 21222064                                                                     | 214555988                                                                    | 151039716                                                                    | 189763612                                                                    |
| <b>Strand</b>                                 | (- strand)                                                                   | (- strand)                                                                   | (+ strand)                                                                   | (- strand)                                                                   | (- strand)                                                                   | (- strand)                                                                   | (- strand)                                                                   | (+ strand)                                                                   |
| <b>ORF Length<br/>(bp)</b>                    | 3239                                                                         | 2882                                                                         | 2482                                                                         | 1962                                                                         | 2875                                                                         | 2045                                                                         | 1982                                                                         | 1473                                                                         |
| <b>Protein<br/>sequence<br/>length(aa)</b>    | 257                                                                          | 273                                                                          | 258                                                                          | 254                                                                          | 274                                                                          | 311                                                                          | 257                                                                          | 265                                                                          |
| <b>Blast2GO</b>                               | Cell Wall, membrane, plant-type cell wall organization, extracellular region | Cell Wall, membrane, plant-type cell wall organization, extracellular region | Cell Wall, membrane, plant-type cell wall organization, extracellular region | Cell Wall, membrane, plant-type cell wall organization, extracellular region | Cell Wall, membrane, plant-type cell wall organization, extracellular region | Cell Wall, membrane, plant-type cell wall organization, extracellular region | Cell Wall, membrane, plant-type cell wall organization, extracellular region | Cell Wall, membrane, plant-type cell wall organization, extracellular region |
| <b>Orthologous Arabidopsis</b>                | AT2G39700.1                                                                  | AT2G39700.1                                                                  | AT1G26770.2                                                                  | AT1G20190.1                                                                  | AT1G69530.3                                                                  | AT1G69530.2                                                                  | AT2G37640.1                                                                  | AT2G03090.1                                                                  |
| <b>Identity</b>                               | 80.54%                                                                       | 82.49%                                                                       | 76.40%                                                                       | 75.21%                                                                       | 80.00%                                                                       | 83.13%                                                                       | 80.93%                                                                       | 79.18%                                                                       |
| <b>Orthologous Soybean</b>                    | Glyma.12G062700.1                                                            | Glyma.02G248500.1                                                            | Glyma.01G050100.1                                                            | Glyma.17G260400.1                                                            | Glyma.17G101400.4                                                            | Glyma.01G050100.1                                                            | Glyma.02G248500.1                                                            | Glyma.04G167800.1                                                            |
| <b>Identity</b>                               | 84.23%                                                                       | 86.85%                                                                       | 81.20%                                                                       | 76.86%                                                                       | 83.70%                                                                       | 86.61%                                                                       | 85.77%                                                                       | 78.73%                                                                       |
| <b>Orthologous B. dystachyon</b>              | Bradi1g03640.1                                                               | Bradi1g03640.1                                                               | Bradi2g22290.1                                                               | Bradi5g04120.1                                                               | Bradi1g61190.1                                                               | Bradi2g22290.1                                                               | Bradi1g03640.1                                                               | Bradi2g53580.1                                                               |
| <b>Identity</b>                               | 79.34%                                                                       | 81.82%                                                                       | 72.13%                                                                       | 69.08%                                                                       | 70.24%                                                                       | 75.82%                                                                       | 80.33%                                                                       | 76.09%                                                                       |
