# Supplementary material for: Expansin genes expression in growing ovaries and grains of sunflower are tissue-specific and associate with final grain weight
Source: PubMed Central journal article supplement (PMC6280438; doi:10.1186/s12870-018-1535-7), 2018-12-04
Supplement: 12870_2018_1535_MOESM5_ESM.pdf [file 12870_2018_1535_MOESM5_ESM.pdf]

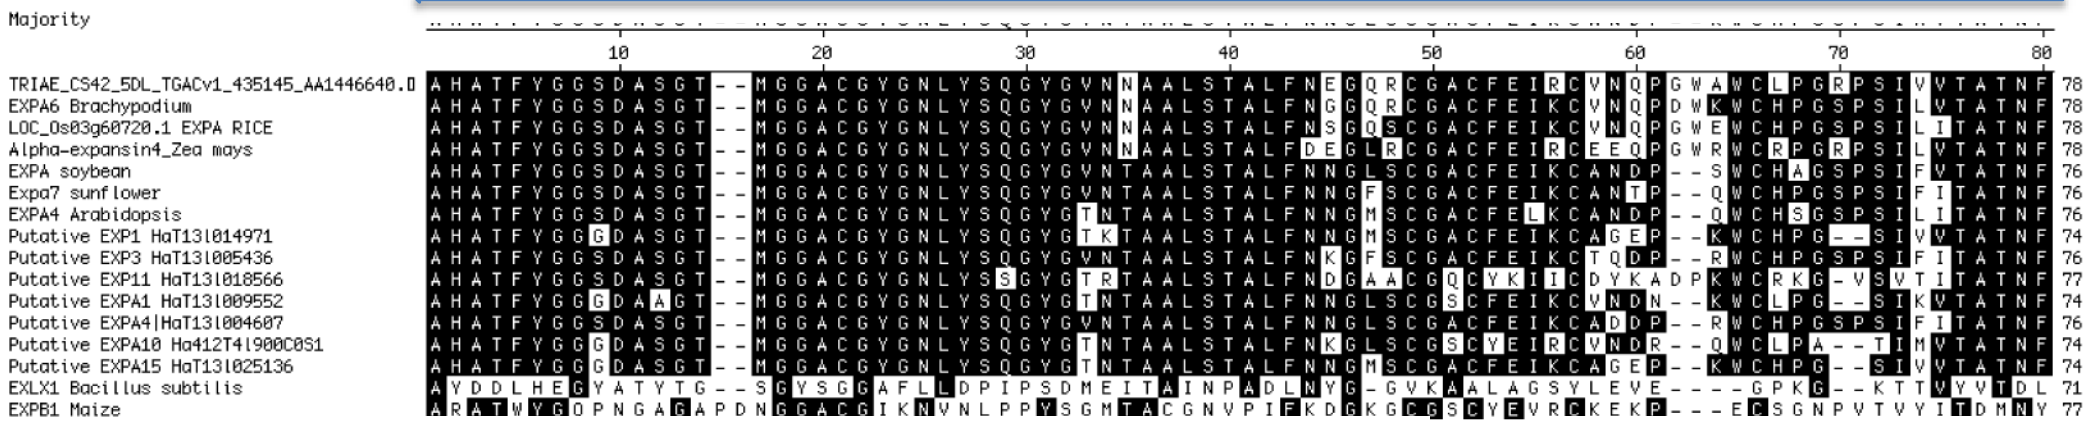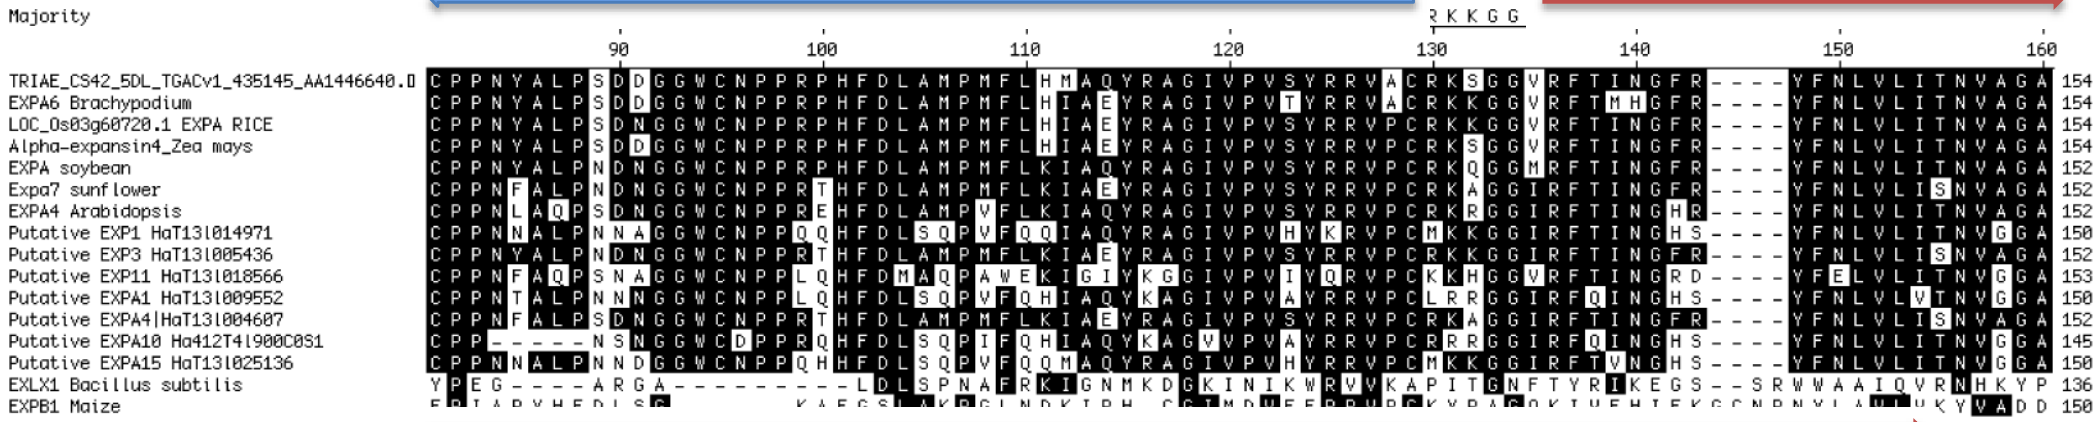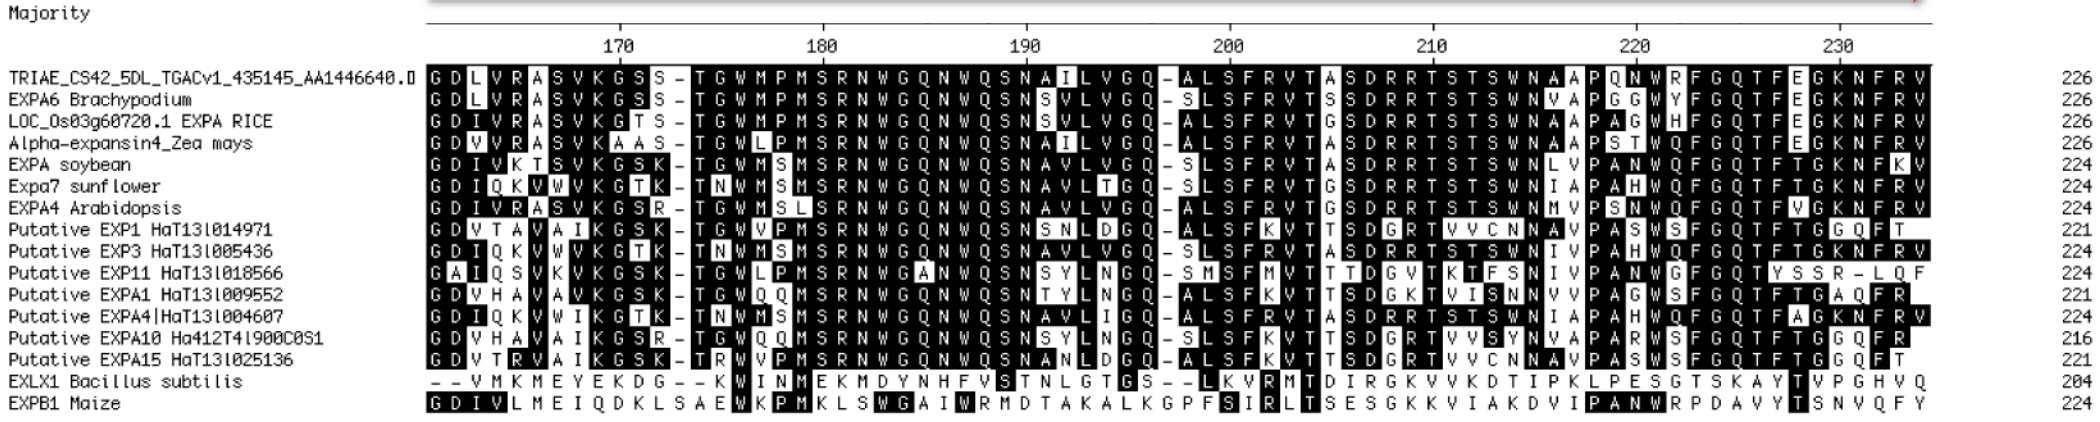

Decoration 'Decoration #1': Shade (with solid black) residues that match the Consensus exactly.

Figure S4
